# Supplementary material for: All-cause mortality in systemic rheumatic diseases under treatment compared with the general population, 2015–2019
Source: HighWire-hosted journal article supplement (doi:10.1136/rmdopen-2021-001694), 2021-11-01
Supplement: rmdopen-2021-001694supp001_data_supplement.pdf [file rmdopen-2021-001694supp001_data_supplement.pdf]

## Supplement

**Table 1.** Predefined ICD-10 codes used to identify patients in each group of the systemic rheumatic diseases under study.

|                              |                                                                                              |
|------------------------------|----------------------------------------------------------------------------------------------|
| Rheumatoid Arthritis         | M05, M05.0, M05.1, M05.2, M05.3, M05.8, M05.9, M06, M06.0, M06.2, M06.3, M06.4, M06.8, M06.9 |
| Ankylosing Spondylitis       | M45, M46, M46.0, M46.1, M46.8, M46.9, M07.2                                                  |
| Psoriatic Arthritis          | M07, M07.0, M07.1, M07.3, L40.5                                                              |
| Systemic Lupus Erythematosus | M32, M32.0, M32.1, M32.8, M32.9                                                              |
| Systemic Sclerosis           | M34, M34.0, M34.1, M34.2, M34.8, M34.9                                                       |

**Table 2.** ATC5 codes of medications used to identify patients in each group of the systemic rheumatic diseases under study

| Medication Class                  | ATC5 code       | Medication          |
|-----------------------------------|-----------------|---------------------|
| conventional synthetic (cs)DMARDs | A07EC01         | sulfasalazine       |
|                                   | L01BA01         | methotrexate sc     |
|                                   | L04AX03         | methotrexate per os |
|                                   | L04AX01         | azathioprine        |
|                                   | L04AA13         | leflunomide         |
|                                   | L04AD01         | ciclosporine        |
|                                   | M01CC01         | D-penicillamine     |
|                                   | P01BA02         | hydroxychloroquine  |
|                                   | L01AA01         | cyclophosphamide    |
|                                   | L04AA06         | mycophenolic acid   |
|                                   | corticosteroids | H02AB01             |
| H02AB02                           |                 | dexamethasone       |
| H02AB03                           |                 | fluocortolone       |
| H02AB04                           |                 | methylprednisolone  |
| H02AB05                           |                 | paramethasone       |
| H02AB06                           |                 | prednisolone        |
| H02AB07                           |                 | prednisone          |
| H02AB08                           |                 | triamcinolone       |
| H02AB09                           |                 | hydrocortisone      |
| H02AB10                           |                 | cortisone           |
| H02AB11                           |                 | prednylidene        |
| H02AB12                           |                 | rimexolone          |
| H02AB13                           |                 | deflazacort         |
| H02AB14                           |                 | cloprednol          |
| H02AB15                           |                 | meprednisone        |
| H02AB17                           |                 | cortivazol          |
| biologic (b)DMARDs                |                 | L04AA24             |
|                                   | L04AC07         | tocilizumab         |
|                                   | L04AC03         | anakinra            |
|                                   | L04AC05         | ustekinumab         |
|                                   | L04AC10         | secukinumab         |
|                                   | L01XC02         | rituximab           |
|                                   | L04AB04         | adalimumab          |
|                                   | L04AB05         | certolizumab pegol  |
|                                   | L04AB01         | etarnecept          |
|                                   | L04AB06         | golimumab           |
| targeted synthetic (ts)DMARDs     | L04AB02         | infliximab          |
|                                   | L04AA26         | belimumab           |
|                                   | L04AA29         | tofacitinib         |
|                                   | L04AA44         | upadacitinib,       |
|                                   | L04AA37         | baricitinib,        |
| advanced vasodilatory therapy     | L04AA32         | apremilast          |
|                                   | C02KX01         | bosentan            |
|                                   | C02KX02         | ambrisentan         |
|                                   | C02KX03         | sitaxentan          |

|                      |         |                              |
|----------------------|---------|------------------------------|
|                      | C02KX04 | macitentan                   |
|                      | C02KX05 | riociguat                    |
|                      | C02KX52 | ambrisentan and<br>tadalafil |
|                      | G04BE08 | tadalafil                    |
|                      | G04BE03 | sildenafil                   |
|                      | G04BE09 | vardenafil                   |
|                      | G04BE10 | avanafil                     |
|                      | G04BE11 | udenafil                     |
|                      | B01AC09 | epoprostenol                 |
|                      | B01AC11 | iloprost                     |
|                      | B01AC19 | beraprost                    |
|                      | B01AC21 | treprostinil                 |
|                      | B01AC27 | selexipag                    |
| antifibrotic therapy | L01XE31 | nintedanib                   |
|                      | L04AX05 | pirfenidone                  |

**Table 3.** Number of deaths reported between 01-Jan-2015 to 31-Dec-2019, among rheumatoid arthritis (RA), ankylosing spondylitis (AS), psoriatic arthritis (PsA), systemic lupus erythematosus (SLE), and systemic sclerosis (SSc) patients registered in the country-wide electronic prescription database of the e-Government Center for Social Security Services and among age and gender matched subjects from the general population, stratified by age and gender. N: number, M: male, F: female).

| Age (years) | Gender | RA       |            |                    |               | AS       |            |                    |            | PsA      |            |                    |            | SLE      |            |                    |            | SSc      |            |                    |            |
|-------------|--------|----------|------------|--------------------|---------------|----------|------------|--------------------|------------|----------|------------|--------------------|------------|----------|------------|--------------------|------------|----------|------------|--------------------|------------|
|             |        | patients |            | general population |               | patients |            | general population |            | patients |            | general population |            | patients |            | general population |            | patients |            | general population |            |
|             |        | N        | Deaths (%) | N                  | Deaths (%)    | N        | Deaths (%) | N                  | Deaths (%) | N        | Deaths (%) | N                  | Deaths (%) | N        | Deaths (%) | N                  | Deaths (%) | N        | Deaths (%) | N                  | Deaths (%) |
| <30         | M      | 166      | 0          | 830                | 3 (0.4)       | 543      | 2 (0.4)    | 2,715              | 8 (0.04)   | 202      | 1 (0.5)    | 1010               | 2 (0.2)    | 93       | 1 (1.1)    | 465                | 0          | 9        | 0          | 45                 | 0          |
|             | F      | 586      | 1 (0.2)    | 2930               | 2 (0.1)       | 351      | 0          | 1,755              | 1 (0.1)    | 262      | 0          | 1,310              | 0          | 578      | 1 (0.2)    | 2,890              | 2 (0.1)    | 50       | 0          | 250                | 0          |
| 30-39       | M      | 332      | 1 (0.3)    | 1,660              | 10 (0.6)      | 1,110    | 1 (0.1)    | 5,550              | 17 (0.3)   | 779      | 2 (0.3)    | 3,895              | 6 (0.2)    | 136      | 3 (2.2)    | 680                | 1 (0.2)    | 22       | 3 (13.6)   | 110                | 2 (1.8)    |
|             | F      | 1,439    | 4 (0.3)    | 7,195              | 15 (0.2)      | 782      | 1 (0.1)    | 3,910              | 8 (0.2)    | 773      | 1 (0.1)    | 3,865              | 8 (0.2)    | 1,351    | 11 (0.8)   | 6,755              | 15 (0.2)   | 161      | 4 (2.5)    | 805                | 1 (0.1)    |
| 40-49       | M      | 823      | 7 (0.9)    | 4,115              | 80 (1.9)      | 1,489    | 10 (0.7)   | 7,445              | 67 (0.9)   | 1,440    | 5 (0.4)    | 7,200              | 54 (0.8)   | 197      | 5 (2.5)    | 985                | 11 (1.1)   | 55       | 2 (3.6)    | 275                | 1 (0.4)    |
|             | F      | 3,753    | 19 (0.5)   | 18,765             | 169 (0.9)     | 1,191    | 1 (0.1)    | 5,955              | 33 (0.55)  | 1,592    | 2 (0.1)    | 7,960              | 42 (0.5)   | 2,018    | 26 (1.3)   | 10,090             | 55 (0.6)   | 303      | 10 (3.3)   | 1515               | 14 (0.9)   |
| 50-59       | M      | 1,592    | 62 (3.9)   | 7,960              | 356 (4.5)     | 1,355    | 27 (2.0)   | 6,775              | 205 (3.0)  | 1,516    | 28 (1.9)   | 7,580              | 200 (2.6)  | 222      | 16 (7.2)   | 1,110              | 34 (3.1)   | 80       | 9 (11.3)   | 400                | 14 (3.5)   |
|             | F      | 7,409    | 82 (1.1)   | 37,045             | 643 (1.7)     | 1,120    | 7 (0.6)    | 5,600              | 69 (1.2)   | 2,152    | 16 (0.7)   | 10,760             | 151 (1.4)  | 2,274    | 60 (2.6)   | 11,370             | 176 (1.6)  | 476      | 30 (6.3)   | 2,380              | 29 (1.2)   |
| 60-69       | M      | 2,470    | 155 (6.3)  | 12,350             | 1,233 (10.0)  | 766      | 30 (3.9)   | 3,830              | 224 (5.9)  | 1,355    | 49 (3.6)   | 6,775              | 388 (5.7)  | 237      | 33 (13.9)  | 1,185              | 66 (5.6)   | 69       | 14 (20.3)  | 345                | 23 (6.7)   |
|             | F      | 9,229    | 252 (2.7)  | 46,145             | 1,822 (4.0)   | 525      | 11 (2.1)   | 2,625              | 73 (2.8)   | 1,717    | 39 (2.3)   | 8,585              | 241 (2.8)  | 1,700    | 97 (5.7)   | 8,500              | 252 (3.0)  | 560      | 62 (11.1)  | 2800               | 101 (3.6)  |
| 70-79       | M      | 2,584    | 370 (14.3) | 12,920             | 2,218 (17.2)  | 241      | 26 (10.8)  | 1,205              | 158 (13.1) | 719      | 76 (10.6)  | 3,595              | 463 (12.9) | 162      | 36 (22.2)  | 810                | 107 (13.2) | 31       | 8 (25.8)   | 155                | 12 (7.7)   |
|             | F      | 8,032    | 717 (8.9)  | 40,160             | 4,088 (10.18) | 173      | 15 (8.7)   | 865                | 66 (7.6)   | 874      | 62 (7.1)   | 4,370              | 322 (7.4)  | 1,015    | 125 (12.3) | 5,075              | 462 (9.1)  | 340      | 75 (22.1)  | 1700               | 165 (9.7)  |
| ≥80         | M      | 1,127    | 265 (23.5) | 5,635              | 1,667 (29.6)  | 40       | 16 (40.0)  | 200                | 49 (24.5)  | 203      | 51 (25.1)  | 1015               | 257 (25.3) | 78       | 36 (46.2)  | 390                | 129 (33.1) | 13       | 5 (38.5)   | 65                 | 9 (13.9)   |

|       |   |        |             |         |                 |       |           |        |           |        |              |        |             |        |            |        |                |       |               |        |               |
|-------|---|--------|-------------|---------|-----------------|-------|-----------|--------|-----------|--------|--------------|--------|-------------|--------|------------|--------|----------------|-------|---------------|--------|---------------|
|       | F | 3,193  | 790 (24.7)  | 15,965  | 4,615<br>(28.9) | 21    | 3 (14.3)  | 105    | 20 (19.0) | 195    | 44<br>(22.6) | 975    | 211 (21.6)  | 379    | 135 (35.6) | 1,895  | 502<br>(26.5)  | 108   | 39<br>(36.1)  | 540    | 127<br>(23.5) |
| Total | - | 42,735 | 2,725 (6.4) | 213,675 | 16,811<br>(7.9) | 9,707 | 150 (1.5) | 48,535 | 998 (2.0) | 13,779 | 376<br>(2.7) | 68,895 | 2,345 (3.4) | 10,440 | 585 (5.6)  | 52,200 | 1,812<br>(3.5) | 2,277 | 261<br>(11.5) | 11,385 | 498<br>(4.4)  |

**Table 4.** Three- and five-year survival with 95% Confidence Intervals of patients with systemic rheumatic disease and age and gender matched individuals from the general population, derived from Kaplan-Meier analysis for the entire cohort, for male and female subjects and for subjects <50 years and ≥50 years of age. RA: Rheumatoid Arthritis, AS: Ankylosing Spondylitis, PsA: Psoriatic Arthritis, SLE: Systemic Lupus Erythematosus, SSc Systemic Sclerosis, CI: Confidence Interval.

|     |           |                    | Survival (95% CI)    |                      |                      |                      |                      |
|-----|-----------|--------------------|----------------------|----------------------|----------------------|----------------------|----------------------|
|     |           |                    | Entire cohorts       | Males                | Females              | < 50 years           | ≥50 years            |
| RA  | 36 months | patients           | 94.9% (94.6 to 95.1) | 91.7% (91.0 to 92.3) | 95.7% (95.5 to 95.9) | 99.7% (99.5 to 99.8) | 93.9% (93.6 to 94.2) |
|     |           | general population | 92.8% (92.7 to 92.9) | 88.1% (87.8 to 88.4) | 94.0% (93.9 to 94.2) | 99.3% (99.2 to 99.4) | 91.5% (91.4 to 91.7) |
|     | 60 months | patients           | 90.2% (89.8 to 90.6) | 85.0% (83.8 to 86.1) | 91.6% (91.1 to 92.0) | 99.2% (98.9 to 99.5) | 88.5% (88.0 to 88.9) |
|     |           | general population | 89.0% (88.8 to 89.2) | 82.6% (82.0 to 83.2) | 90.7% (90.5 to 90.8) | 99.0% (98.9 to 99.1) | 87.1% (86.9 to 87.3) |
| AS  | 36 months | patients           | 98.9% (98.6 to 99.1) | 98.6% (98.2-98.9)    | 99.2% (98.8 to 99.5) | 99.8% (99.6 to 99.9) | 97.6% (97.1 to 98.1) |
|     |           | general population | 98.2% (98.1 to 98.3) | 97.8% (97.6 to 98.0) | 98.8% (98.6 to 98.9) | 99.6% (99.5 to 99.7) | 96.4% (96.2 to 96.7) |
|     | 60 months | patients           | 97.4% (96.7 to 98.0) | 96.7% (95.3 to 97.7) | 98.5% (97.9 to 98.9) | 99.6% (99.3 to 99.7) | 95.0 (93.5 to 96.1)  |
|     |           | general population | 96.9% (96.6 to 97.1) | 96.2% (95.8 to 96.6) | 97.8% (97.5 to 98.1) | 99.3% (99.1 to 99.4) | 94.1% (93.5 to 94.5) |
| PsA | 36 months | patients           | 97.8% (97.6 to 98.1) | 97.2% (96.7 to 95.9) | 98.4% (98.1 to 98.7) | 99.9% (99.7 to 99.9) | 96.7% (96.2 to 97.1) |
|     |           | general population | 97.0% (96.8 to 97.1) | 96.1% (95.8 to 96.3) | 97.8% (97.5 to 97.9) | 99.6% (99.5 to 99.7) | 95.4% (95.2 to 95.6) |
|     | 60 months | patients           | 95.7% (95.2 to 96.1) | 94.8% (94.0 to 95.5) | 96.4% (95.8 to 97.0) | 99.6% (99.1 to 99.8) | 93.5% (92.8 to 94.2) |
|     |           | general population | 94.9% (94.7 to 95.2) | 93.5% (93.1 to 93.9) | 96.1% (95.9 to 96.4) | 99.3% (99.2 to 99.5) | 92.4% (92.1 to 92.8) |
| SLE | 36 months | patients           | 96.0% (95.6 to 96.4) | 91.6% (89.8 to 93.2) | 96.5% (96.1 to 96.9) | 99.2% (98.9 to 99.5) | 93.6% (93.0 to 94.3) |
|     |           | general population | 97.4% (97.2 to 97.5) | 95.1% (94.5 to 95.7) | 97.6% (97.5 to 97.8) | 99.7% (99.6 to 99.8) | 95.7% (95.5 to 95.9) |
|     | 60 months | patients           | 92.6% (92.0 to 93.2) | 84.3% (81.4 to 86.8) | 93.6% (93.0 to 94.2) | 98.6% (98.1 to 98.9) | 88.5% (87.5 to 89.4) |
|     |           | general population | 95.5% (95.3 to 95.7) | 91.9% (91.0 to 92.8) | 95.9% (95.7 to 96.1) | 99.5% (99.4 to 99.6) | 92.7% (92.4 to 93.1) |
| SSc | 36 months | patients           | 91.4% (90.1 to 92.6) | 89.2% (84.4 to 92.6) | 91.7% (90.3 to 92.9) | 97.6% (95.9 to 98.7) | 89.2% (87.5 to 90.7) |
|     |           | general population | 96.3% (95.9 to 96.7) | 95.9% (94.6 to 96.9) | 96.4% (95.9 to 96.7) | 99.4% (99.0 to 99.7) | 95.2% (94.7 to 95.7) |

|  |           |                    |                      |                      |                       |                      |                      |
|--|-----------|--------------------|----------------------|----------------------|-----------------------|----------------------|----------------------|
|  | 60 months | patients           | 83.6% (81.6 to 85.5) | 76.5% (68.3 to 82.8) | 84.56% (82.5 to 86.4) | 95.2% (92.2 to 97.0) | 79.6% (77.0 to 81.9) |
|  |           | general population | 94.1% (93.6 to 94.7) | 94.4% (92.8 to 95.6) | 94.1% (93.5 to 94.7)  | 99.2% (98.7 to 99.5) | 92.3% (91.6 to 93.0) |
